# Supplementary material
Source: PubMed Central journal article supplement (PMC4017010)
Supplement: NIHMS541180-supplement-01.pdf [file NIHMS541180-supplement-01.pdf]

## 1 **Supplementary Material**

2 Unless otherwise noted, reagents were obtained from Sigma-Aldrich (St. Louis, MO).

### 3 **Cell Isolation and Construct Culture**

4 Primary chondrocytes were isolated from articular cartilage of bovine calf (2 months old)  
5 carpometacarpal joints digested with type IV collagenase (activity = 747 U/g) in high glucose Dulbecco's  
6 Modified Eagle's Medium (hgDMEM) (Invitrogen, Carlsbad, CA) supplemented with 5% fetal bovine  
7 serum (Invitrogen), amino acids, buffering agents, and 1% antibiotic-antimycotic (Invitrogen) at 37 °C on  
8 a shaker for 6 hours (Lima et al., 2007). Cells were encapsulated in 2% agarose (type VII-A) at a density  
9 of  $30 \times 10^6$  cells/mL. Constructs were cored from the cell-agarose mixture ( $\varnothing 4$  mm  $\times$  2.3 mm thick) and  
10 cultured under static conditions for 45 days in chemically-defined, chondrogenic media (hgDMEM, 100  
11 nM dexamethasone, 100  $\mu$ g/mL sodium pyruvate, 50  $\mu$ g/mL L-proline, 1% ITS+ premix (Becton  
12 Dickinson, Sparks, MD), 1% antibiotic-antimycotic, and 173 nmol/mL ascorbic acid 2-phosphate) at 37  
13 °C under 5% CO<sub>2</sub> tension (Lima et al., 2007). Media were supplemented with 10 ng/mL TGF- $\beta$ 3 (R&D  
14 Systems, Minneapolis, MN) for either the entire culture period ( $\beta$ 3+ group) or for only the first 14 days of  
15 culture ( $\beta$ 3- group). A control group was cultured without TGF- $\beta$ 3 supplementation. Media were  
16 changed three times per week and conditioned media aliquots were taken at each media change.

### 17 **Mechanical Characterization**

18 Constructs ( $n = 4$  per group and time point) were removed after 14, 28, and 45 days of culture. At each  
19 time point, constructs were mechanically tested in a custom device using unconfined compression with  
20 impermeable metal loading platens. Sample thickness and diameter were measured prior to loading.  
21 Samples were equilibrated under a creep load in a bath of phosphate buffered saline for 400 s. A stress  
22 relaxation test was then performed by ramping the displacement at a constant rate to 10% of the original  
23 thickness over 300 s, then relaxing for 1500 s. The stress relaxation data was curve-fitted to extract

24 mechanical properties similar to previous work (Cigan et al., 2013; Huang et al., 2012). This  
25 optimization analysis, performed in FEBio (febio.org), models the CTE constructs as a biphasic material  
26 consisting of both an intrinsically incompressible fluid and porous, solid matrix. Here, the solid matrix  
27 was modeled as a mixture of a neo-Hookean ground material (e.g., representing the scaffold material and  
28 GAG) and a continuous fiber distribution material (representing collagen) where fibers sustain tension  
29 only, with a linear variation of stress with strain (Ateshian et al., 2009). These fits were able to extract the  
30 equilibrium compressive modulus  $E_Y$ , the hydraulic permeability  $k$ , and the fiber modulus  $\zeta$ . The  
31 optimization results fit the experimental data with  $R^2 = 0.95 \pm 0.05$  (for all samples), a result consistent  
32 with prior results with similar engineered tissue constructs (Cigan et al., 2013; Huang et al., 2012).

33 Since fiber recruitment in a continuous fiber distribution model depends on the state of strain, the  
34 parameter  $\zeta$  does not represent the actual tensile modulus of the construct. Therefore, the construct tensile  
35 modulus,  $E_T$ , was determined by modeling the equilibrium response to a homogeneous tensile  
36 deformation of a material with the same  $E_Y$  and  $\zeta$  determined from the curve-fitting of the unconfined  
37 stress-relaxation response. In a prior study (Huang et al., 2012), it was shown that this method for  
38 predicting  $E_T$  from unconfined compression stress-relaxation experiments produced a value statistically  
39 not different from tensile test measurements.

## 40 **Biochemical Analysis**

41 After mechanical testing, constructs were radially halved and both halves were weighed. The construct  
42 masses were used to normalize the biochemical content and to calculate the swelling ratio for each group  
43 where normalized disk volume = (average construct mass at time point)/(average construct mass on day  
44 0). One half was digested with proteinase K (MP Biomedical, Santa Ana, CA) and the other half was  
45 digested with guanidine. Samples were lyophilized prior to the proteinase K digestion (0.5 mg/ml) as  
46 previously described (Hollander et al., 1994). Guanidine digestion was performed with 4 M guanidine  
47 HCl at 4 °C for 16 hours. GAG, collagen, and pyridinoline content were measured from the proteinase K  
48 digests. GAG content was assayed using the 1,9 dimethylmethylene blue dye-binding (DMMB) assay

49 (Farndale et al., 1986). Collagen and pyridinoline content were assayed after acid hydrolysis of the  
50 digests using an ortho-hydroxyproline (OHP) assay (Stegemann and Stalder, 1967) and a pyridinoline  
51 specific enzyme linked immunosorbent assay (ELISA; Quidel Corporation, San Diego, CA), respectively.  
52 Pyridinoline content was not measured on day 0 due to the low collagen content ( $\sim 0$ ). A 1:7.64  
53 OHP:total collagen mass ratio was used to determine collagen content (Hollander et al., 1994). COMP  
54 was measured from the guanidine digests with a COMP specific ELISA (MDBiosciences, St. Paul, MN).  
55 GAG and COMP were measured in the conditioned media samples directly, without digestion, using the  
56 DMMB assay and COMP ELISA, respectively. Media samples were pooled between two media changes  
57 for the COMP assay and the mass of COMP released into the media was averaged over the span of the  
58 two sequential media changes. Collagen media concentrations were assayed via the OHP assay of acid-  
59 hydrolyzed media samples. Pyridinoline content is presented both as a concentration and a molar fraction  
60 to collagen: mol pyridinoline/mol collagen triple helix (collagen triple helix MW = 285 kDa) (Grant and  
61 Prockop, 1972).

## 62 **Statistics**

63 The biochemical concentrations, equilibrium compressive modulus  $E_y$ , hydraulic permeability  $k$ ,  
64 equilibrium tensile modulus  $E_T$ , and normalized disk volume (disk volume normalized to day 0 volume)  
65 of the constructs were compared with a two-way analysis of variance (ANOVA) using Tukey's HSD  
66 post-hoc test ( $\alpha = 0.05$ ). Synthesis rates were compared with an analysis of covariance of the cumulative  
67 mass per construct released to the media and the mass accumulated in the scaffold over the culture time  
68 (day 0 to 45 for the control and  $\beta 3+$  groups and day 14 to 45 for the  $\beta 3-$  group) (Sokal and Rohlf, 1995).  
69 Retention fractions for each matrix constituent were compared using an ANOVA of each group's mean,  
70 uncertainty, and  $n$  (total number of constructs and media aliquots for each supplementation group)  
71 (Cohen, 2002). Data are reported as mean  $\pm$  standard deviation (for GAG, collagen, mechanical  
72 properties, and swelling ratio,  $n = 4$ ; for COMP and pyridinoline,  $n = 3$ ). For each group and constituent,  
73 the fit between the experimental and binding kinetics model was determined by nonlinear regression for

74 both the construct matrix (sum of bound and soluble matrix within the construct) and cumulative matrix  
75 media release.

## 76 **Human Patella-Sized Construct Model**

### 77 **Computational Anatomical Model**

78 Three-dimensional finite element model of the patella construct was constructed from the anatomical  
79 human patella surfaces obtained using stereophotogrammetry (Ateshian et al., 1992; Ateshian et al., 1991;  
80 Hung et al., 2003). The cellular agarose gel construct was modeled atop a porous bone scaffold. To  
81 model the experimental conditions, in which the porous trabecular bone scaffold was filled with the  
82 chondrocyte-embedded agarose gel, the scaffold was also modeled with a cellular component (Figure  
83 S2A). The gel construct was seeded at  $60 \times 10^6$  cells/mL; this cell density informs both the matrix  
84 synthesis and nutrient consumption rates. Likewise, the consumption and synthesis parameters in the  
85 bone scaffold region were based on trabecular bone having a porosity of 80% (trabecular bone porosity >  
86 70%; (Schaffler and Burr, 1988)); therefore the effective cell density within the scaffold was  $48 \times 10^6$   
87 cells/mL. The model was analyzed with the FEBio finite element software (www.febio.org) which  
88 incorporates transport mechanics and chemical kinetics. We have included a table outlining the salient  
89 features of this model and the synthesis model presented in the manuscript here (Table S1).

### 90 **Culture Conditions**

91 In the model, the construct was surrounded with a bath containing 75 mL of media (Supp. Figure 2B).  
92 The media and construct glucose concentration was initially set at 25 mM and the soluble and bound  
93 matrix concentrations were initially 0 (day 0). During the culture simulation the ‘cells’ within the  
94 construct and scaffold consumed glucose and synthesized soluble matrix, thereby decreasing glucose  
95 concentration and increasing soluble ECM product concentration in the construct and surrounding media.  
96 Glucose was consumed according to the consumption rate measured experimentally as described below;  
97 matrix was synthesized according to the rates measured as described in the main text. As the original

108 | patella construct experiment was performed in the absence of TGF-β3 supplementation, the synthesis and  
109 | binding parameters found for the ‘control’ case (Table 1) were used in the model simulation. Consistent  
110 | with the experiment, the media in the model was ‘changed’ three times per week (in a 2-2-3 day  
111 | sequence) over the 35-day culture. Media changes consisted of resetting the media solution to 25 mM  
112 | glucose concentration and 0 mM soluble ECM product concentration.

### 113 | **Matrix Synthesis and Glucose Consumption**

114 | Three chemical reactions were modeled in this finite element analysis. Both glucose consumption and  
115 | GAG synthesis were modeled according to Michaelis-Menten kinetics according to the available glucose  
116 | concentration:

$$\hat{c}^{\alpha} = \frac{R^{\alpha} \times c^{Glu}}{K_m + c^{Glu}} \quad (S1)$$

117 | where  $R^{\alpha}$  is either the glucose consumption rate ( $R^{Glu} < 0$ ; [nmol  $\mu\text{L}^{-1}$  s $^{-1}$ ]) or the GAG synthesis rate ( $R^{GAG} > 0$ ; [nmol  $\mu\text{L}^{-1}$  s $^{-1}$ ]). Therefore, the three equations modeled were: (1) Glucose uptake by cells  
118 | according to equation (S1) where  $\hat{c}^{\alpha} = \hat{c}^{Glu}$ ; here the maximal cellular glucose consumption rate,  $R^{Glu}$ ,  
119 | was experimentally determined (below) and the Michaelis constant,  $K_m = 0.35$  mM, was taken from  
120 | previous experiments on chondrocytes (Windhaber et al., 2003). (2) Soluble GAG synthesis was modeled  
121 | according to equation (S1) where  $\hat{c}^{\alpha} = \hat{c}^{GAG}$  and the maximal synthesis rate,  $R^{GAG}$ , was taken from the  
122 | previous experimental synthesis results (scaled appropriately for the cellularity of both the gel construct  
123 | and scaffold) and the Michaelis constant,  $K_m$ , was the same as the glucose consumption reaction.  
124 | Additionally, based on our earlier finding that low levels of glucose results in no significant ECM  
125 | deposition (Cigan et al., 2013), a nutrient threshold level was added to the synthesis equation, such that  
126 | ECM synthesis was completely inhibited within regions where the glucose concentration was below the  
127 | threshold level. (3) GAG deposition was modeled using standard reversible binding kinetics of the  
128 | soluble GAG with the extracellular matrix, based on the parameters curve-fitted to the experimental data  
129 | of this study.

121 The following additional experiments were performed to identify the remaining necessary parameters  
122 (cellular glucose consumption rate and ECM nutrient threshold) for this system:

### 123 **Glucose Consumption Rate**

124 Constructs ( $\varnothing$ 4 mm  $\times$  2.34 mm thick,  $10 \times 10^6$  cells/mL in 2% agarose gel) were cultured as previously  
125 described for 7 weeks. On weeks 1, 3, 5, and 7, media samples were taken 4, 8, 24, 48 and 72 hours after  
126 a media change ( $n = 3$  for each time) and assayed for glucose (Amplex Red Glucose Assay, Invitrogen)  
127 and DNA content. The glucose consumption rate was calculated from the slope of the glucose media loss  
128 over 72 h (Figure S2). The average glucose consumption rate was calculated to be  $1.24 \pm 0.35 \times 10^{-13}$   
129 mol cell<sup>-1</sup> hr<sup>-1</sup> during the seven week culture. This level of glucose consumption was similar to previously  
130 measured consumption rates of bovine chondrocytes both in monolayer and three-dimensional culture  
131 (Marcus, 1973; Obradovic et al., 1999).

### 132 **ECM Nutrient Threshold**

133 Based on our prior work identifying glucose as a critical nutrient for this CTE system, it was necessary to  
134 find the critical concentration of glucose needed to sustain normal ECM deposition. Constructs ( $\varnothing$ 4 mm  
135  $\times$  2.34 mm thick,  $30 \times 10^6$  cells/mL in 2% agarose gel) were cultured as previously described for 6 weeks.  
136 Media were prepared using glucose-free DMEM, and glucose was supplemented to produce 0.17 $\times$ , 0.5 $\times$ ,  
137 0.67 $\times$ , 0.83 $\times$ , and 1 $\times$  the levels of glucose present in typical hgDMEM (4.5 mg/L = 25 mM). Constructs  
138 were taken on day 42 for mechanical ( $E_Y$ ) and biochemical testing (GAG, collagen, DNA) as previously  
139 described.  $E_Y$ , GAG, collagen, and DNA were statistically similar between the 0.5 $\times$ , 0.67 $\times$ , 0.83 $\times$  groups  
140 and the 1 $\times$  group after 6 weeks (Table S2). The 0.17 $\times$  supplementation group, however, failed to  
141 accumulate significant GAG and collagen, experiencing decreased cellularity, and exhibiting significantly  
142 poorer mechanical properties. There was also a decrease in the construct cellularity in the 0.17 $\times$  group,  
143 which could also decrease the ECM synthesis capacity of GAG and collagen in addition to the low  
144 nutrient availability of the treatment. Accordingly, for modeling the patella, we chose a level of 0.5 $\times$   
145 (12.5 mM) as the critical glucose concentration necessary for ECM synthesis.

## 146 **Correlations between Mechanical Properties and Biochemical Composition**

147  $E_Y$  showed a high correlation with GAG concentration (Figure S4A;  $R^2 = 0.74$ ). Relatively low  
148 correlations were found for  $E_Y$  versus collagen or COMP (Figure S4B;  $R^2 = 0.31$  and Figure S4C;  $R^2 =$   
149  $0.32$ , respectively).  $E_Y$  was moderately correlated to pyridinoline concentration (Figure S4D;  $R^2 = 0.47$ ).  
150 The swelling ratio displayed a high correlation to GAG concentration (Figure S4E;  $R^2 = 0.74$ ), a moderate  
151 correlation to collagen concentration (Figure S4F;  $R^2 = 0.48$ ), a poor correlation to COMP (Supp. Fig. 4G;  
152  $R^2 = 0.27$ ), and a moderate correlation to pyridinoline (Figure S4H;  $R^2 = 0.56$ ).  $E_T$  was moderately  
153 correlated with GAG and pyridinoline (Figure S4I;  $R^2 = 0.49$  and Figure S4L;  $R^2 = 0.50$ , respectively)  
154 and poorly correlated with collagen and COMP (Figure S4J;  $R^2 = 0.20$  and Figure S4K;  $R^2 = 0.33$ ,  
155 respectively).

## 156 **Figure Captions**

157 Figure S1: (A) Schematic for the experimental set-up idealized in the matrix-binding-diffusion model.  
158 (B) A representative result of the bound matrix spatial distributions within the tissue phase of the  
159 construct (GAG accumulation in the  $\beta 3$ - group).

160 Figure S2: (A) Finite element mesh and geometric model of the anatomical patella construct supported on  
161 the porous, chondral scaffold which is embedded with a cellular agarose gel, and (B) a cross sectional  
162 image of the construct surrounded within the 75 mL bath.

163 Figure S3: The average depletion of media glucose due to chondrocyte consumption over a 72 hour  
164 period (data represents the mean and standard deviations of the values from weeks 1, 3, 5, and 7 of  
165 culture).

166 Figure S4: Correlations between the mechanical properties  $E_Y$  (A-D), swelling ratio (E-H) and  $E_T$  (I-L)  
167 and the biochemical concentrations of GAG (A, E, I), collagen (B, F, J), COMP (C, G, K) and  
168 pyridinoline (D, H, L).

169

169

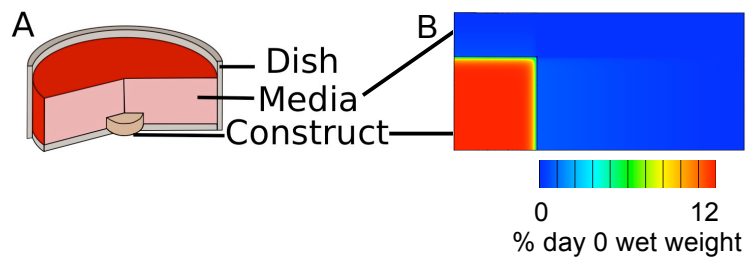

**Figure S1**

170

171



171

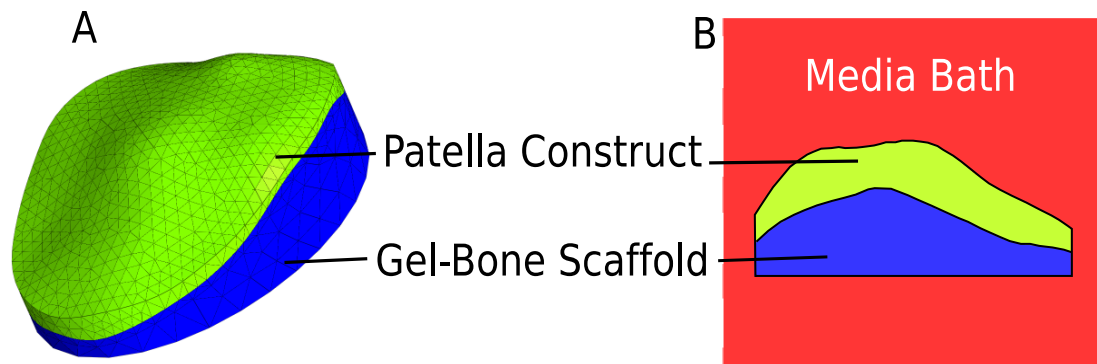

**Figure S2**

172

172

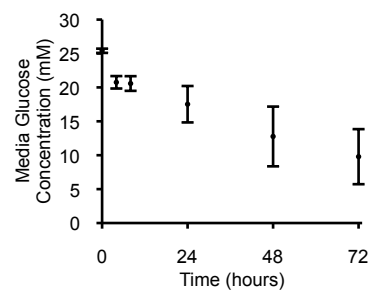

**Figure S3**

173

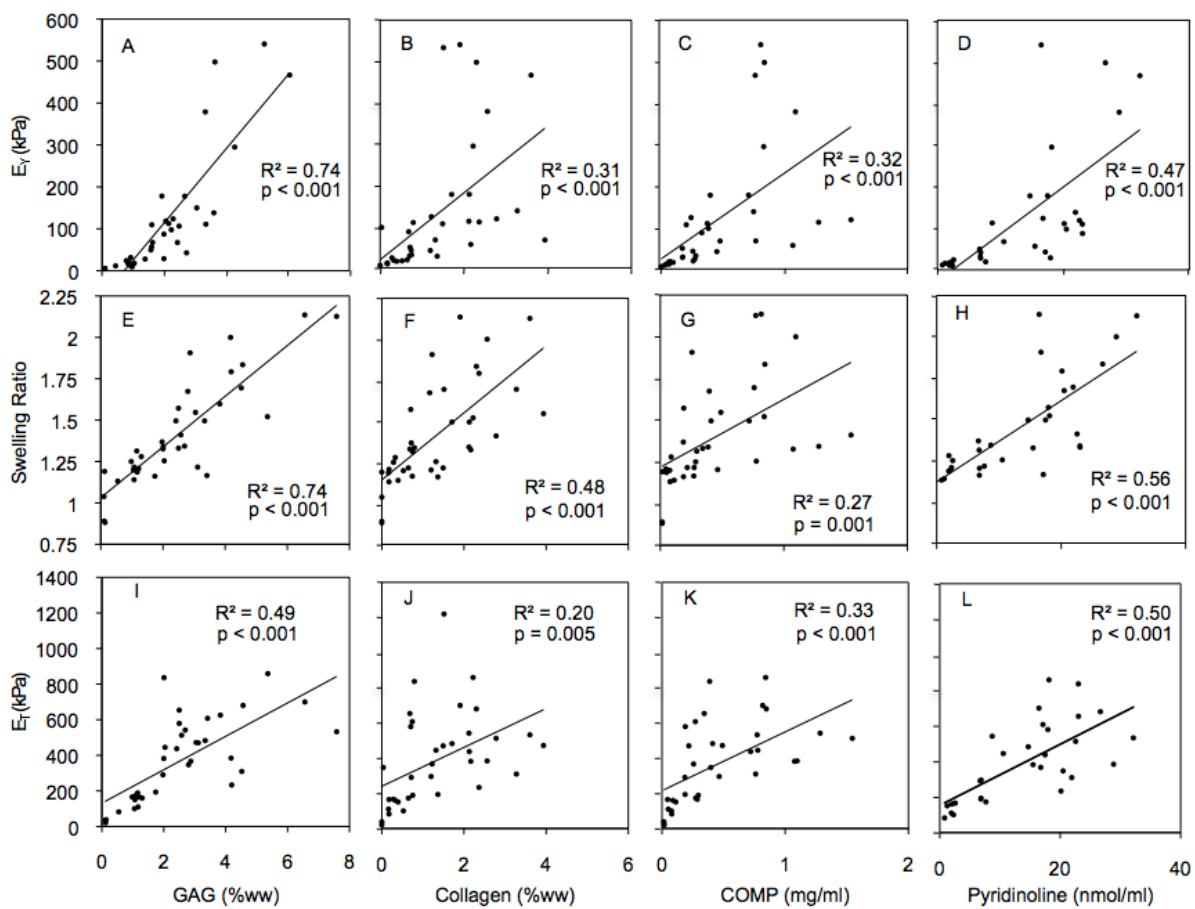

Figure S4

## A. Small construct synthesis model

|                          |                                     |                                          |
|--------------------------|-------------------------------------|------------------------------------------|
| $\hat{c}_{syn}^{\alpha}$ | Matrix synthesis rate               | [nmol $\mu\text{L}^{-1} \text{s}^{-1}$ ] |
| $k_f^{\alpha}$           | Matrix forward-binding rate         | [mM <sup>-1</sup> s <sup>-1</sup> ]      |
| $k_r^{\alpha}$           | Matrix reverse-binding rate         | [s <sup>-1</sup> ]                       |
| $N_t$                    | Matrix binding-site density         | [mM]                                     |
| $D_o^{\alpha}$           | Matrix diffusivity in free solution | [mm <sup>2</sup> s <sup>-1</sup> ]       |
| $D^{\alpha}$             | Matrix diffusivity in construct     | [mm <sup>2</sup> s <sup>-1</sup> ]       |
| $\varphi_s$              | Solid volume fraction of construct  | [ - ]                                    |

## B. Large patella-construct model

|                |                                                               |                                          |
|----------------|---------------------------------------------------------------|------------------------------------------|
| $R^{GAG}$      | GAG synthesis rate                                            | [nmol $\mu\text{L}^{-1} \text{s}^{-1}$ ] |
| $k_f^{GAG}$    | GAG forward-binding rate                                      | [mM <sup>-1</sup> s <sup>-1</sup> ]      |
| $k_r^{GAG}$    | GAG reverse-binding rate                                      | [s <sup>-1</sup> ]                       |
| $N_t$          | GAG binding-site density                                      | [mM]                                     |
| $K_m$          | Michaelis constant                                            | [mM]                                     |
| $R^{Glu}$      | Glucose consumption rate                                      | [nmol $\mu\text{L}^{-1} \text{s}^{-1}$ ] |
| $c_o$          | Glucose concentration threshold for GAG synthesis             | [mM]                                     |
| $D_o^{\alpha}$ | Glucose/GAG diffusivity in free solution                      | [mm <sup>2</sup> s <sup>-1</sup> ]       |
| $D^{\alpha}$   | Glucose/GAG diffusivity in agarose and agarose/bone construct | [mm <sup>2</sup> s <sup>-1</sup> ]       |
| $\varphi_s$    | Solid volume fraction of agarose and agarose/bone construct   | [ - ]                                    |

175

176 Table S1: The model parameters for (A) the matrix synthesis model used to characterize the reversible  
 177 binding rates ( $\alpha = \text{GAG, collagen, COMP}$ ;  $s = \text{agarose-gel scaffold}$ ) and (B) the large patella-construct  
 178 featuring glucose concentration dependent GAG synthesis and reversible GAG binding ( $\alpha = \text{GAG,}$   
 179 glucose;  $s = \text{agarose-gel and agarose-filled chondral scaffold}$ ).

180 | **Table S2**

|            |              | $E_Y$ [kPa]           | GAG [%ww]                 | Collagen [%ww]        | DNA [ $\mu$ g/disk]       |
|------------|--------------|-----------------------|---------------------------|-----------------------|---------------------------|
| <u>(1)</u> | <u>0.17×</u> | $30 \pm 28^{2,3,4,5}$ | $1.51 \pm 0.32^{2,3,4,5}$ | $0.64 \pm 0.19^{3,4}$ | $7.08 \pm 1.47^{2,3,4,5}$ |
| <u>(2)</u> | <u>0.5×</u>  | $481 \pm 100^1$       | $5.93 \pm 0.27^1$         | $1.33 \pm 0.50$       | $11.05 \pm 0.50^1$        |
| <u>(3)</u> | <u>0.67×</u> | $365 \pm 170^1$       | $5.90 \pm 0.56^1$         | $1.77 \pm 0.62^1$     | $9.86 \pm 0.48^1$         |
| <u>(4)</u> | <u>0.83×</u> | $482 \pm 145^1$       | $4.76 \pm 1.66^1$         | $1.74 \pm 0.67^1$     | $10.95 \pm 0.54^1$        |
| <u>(5)</u> | <u>1×</u>    | $449 \pm 158^1$       | $4.76 \pm 0.65^1$         | $1.28 \pm 0.33$       | $11.50 \pm 1.21^1$        |

181  
 182 | Table S2: Mechanical ( $E_Y$ ) and biochemical (GAG, collagen, and DNA content) results after 6 week  
 183 culture of constructs supplemented at each media change with either 0.17×, 0.5×, 0.67×, 0.83×, or 1×  
 184 glucose levels (1× corresponds to typical 25 mM supplementation). The superscripts within each  
 185 outcome indicate the treatments between which there is a significant difference ( $p < 0.05$ ).

186

186 **Reference:**

- 187 Ateshian, G.A., Rajan, V., Chahine, N.O., Canal, C.E., Hung, C.T., 2009. Modeling the matrix of  
188 articular cartilage using a continuous fiber angular distribution predicts many observed  
189 phenomena. *Journal of Biomechanical Engineering* 131, 061003.
- 190 Ateshian, G.A., Rosenwasser, M.P., Mow, V.C., 1992. Curvature characteristics and congruence of the  
191 thumb carpometacarpal joint: differences between female and male joints. *Journal of*  
192 *Biomechanics* 25, 591-607.
- 193 Ateshian, G.A., Soslowky, L.J., Mow, V.C., 1991. Quantitation of articular surface topography and  
194 cartilage thickness in knee joints using stereophotogrammetry. *Journal of Biomechanics* 24, 761-  
195 776.
- 196 Cigan, A.D., Nims, R.J., Albro, M.B., Esau, J.D., Dreyer, M.P., Vunjak-Novakovic, G., Hung, C.T.P.D.,  
197 Ateshian, G.A., 2013. Insulin, Ascorbate and Glucose Have a Much Greater Influence than  
198 Transferrin and Selenous Acid on the in vitro Growth of Engineered Cartilage in Chondrogenic  
199 Media. *Tissue Engineering. Part A*.
- 200 Cohen, B.H., 2002. Calculating a Factorial ANOVA From Means and Standard Deviations.  
201 *Understanding statistics* 1, 191-203.
- 202 Farndale, R.W., Buttle, D.J., Barrett, A.J., 1986. Improved quantitation and discrimination of sulphated  
203 glycosaminoglycans by use of dimethylmethylene blue. *Biochim Biophys Acta* 883, 173-177.
- 204 Grant, M.E., Prockop, D.J., 1972. The biosynthesis of collagen. 1. *N Engl J Med* 286, 194-199.
- 205 Hollander, A.P., Heathfield, T.F., Webber, C., Iwata, Y., Bourne, R., Rorabeck, C., Poole, A.R., 1994.  
206 Increased damage to type II collagen in osteoarthritic articular cartilage detected by a new  
207 immunoassay. *J Clin Invest* 93, 1722-1732.
- 208 Huang, A.H., Baker, B.M., Ateshian, G.A., Mauck, R.L., 2012. Sliding contact loading enhances the  
209 tensile properties of mesenchymal stem cell-seeded hydrogels. *European Cells and Materials* 24,  
210 29-45.
- 211 Hung, C.T., Lima, E.G., Mauck, R.L., Takai, E., LeRoux, M.A., Lu, H.H., Stark, R.G., Guo, X.E.,  
212 Ateshian, G.A., 2003. Anatomically shaped osteochondral constructs for articular cartilage repair.  
213 *J Biomech* 36, 1853-1864.
- 214 Lima, E.G., Bian, L., Ng, K.W., Mauck, R.L., Byers, B.A., Tuan, R.S., Ateshian, G.A., Hung, C.T., 2007.  
215 The beneficial effect of delayed compressive loading on tissue-engineered cartilage constructs  
216 cultured with TGF-beta3. *Osteoarthritis Cartilage* 15, 1025-1033.
- 217 Marcus, R.E., 1973. Effect of Low Oxygen Concentration on Growth, Glycolysis, and Sulfate  
218 Incorporation by Articular Chondrocytes in Monolayer Culture. *Arthritis Rheum.* 16, 646-656.
- 219 Obradovic, B., Carrier, R.L., Vunjak-Novakovic, G., Freed, L.E., 1999. Gas exchange is essential for  
220 bioreactor cultivation of tissue engineered cartilage. *Biotechnology and Bioengineering* 63, 197-  
221 205.
- 222 Schaffler, M.B., Burr, D.B., 1988. Stiffness of compact bone: effects of porosity and density. *J Biomech*  
223 21, 13-16.
- 224 Sokal, R.R., Rohlf, F.J., 1995. *Biometry : the principles and practice of statistics in biological research*,  
225 3rd ed. W.H. Freeman, New York.
- 226 Stegemann, H., Stalder, K., 1967. Determination of hydroxyproline. *Clin Chim Acta* 18, 267-273.
- 227 Windhaber, R.A.J., Wilkins, R.J., Meredith, D., 2003. Functional characterisation of glucose transport in  
228 bovine articular chondrocytes. *Pflugers Archiv-European Journal of Physiology* 446, 572-577.
- 229
- 230
